# Supplementary material
Source: MDPI journal article supplement (https://www.mdpi.com/2071-1050/14/12/7039)
Supplement: s1 [file s1]

**Table S1.** Comparison between temperatures, speed, lateral position by vehicle type and, types of weight measurements.

| Weight measurements | Speed      | Lateral position | Vehicles                                                  |            |            |                           |           |            |                                                         |           |              |                           |            |            | All vehicles                                           |              |            |                           | All vehicles and pavement temperatures |            |                       |              |            |           |            |           |
|---------------------|------------|------------------|-----------------------------------------------------------|------------|------------|---------------------------|-----------|------------|---------------------------------------------------------|-----------|--------------|---------------------------|------------|------------|--------------------------------------------------------|--------------|------------|---------------------------|----------------------------------------|------------|-----------------------|--------------|------------|-----------|------------|-----------|
|                     |            |                  | Three-axle unarticulated truck with 2 groups of axes (3C) |            |            |                           |           |            | Five-axle articulated truck with 3 groups of axes (2S3) |           |              |                           |            |            | Six-axle articulated truck with 3 groups of axes (3S3) |              |            |                           |                                        |            | All vehicles          |              |            |           |            |           |
|                     |            |                  | Pavement temperatures                                     |            |            | All pavement temperatures |           |            | Pavement temperatures                                   |           |              | All pavement temperatures |            |            | Pavement temperatures                                  |              |            | All pavement temperatures |                                        |            | Pavement temperatures |              |            |           |            |           |
|                     |            |                  | < 37.0 °C                                                 |            | ≥ 37.0 °C  | temperatures              |           | < 37.0 °C  |                                                         | ≥ 37.0 °C | temperatures |                           | < 37.0 °C  |            | ≥ 37.0 °C                                              | temperatures |            | < 37.0 °C                 |                                        |            | ≥ 37.0 °C             | temperatures |            | < 37.0 °C |            | ≥ 37.0 °C |
| GVW                 | 60 km/h    | Center           | 0.0002*                                                   | -          | 0.1690 NS  | 0.0002*                   | 0.4240 NS | 0.0328*    | -                                                       | 0.0003*   | 0.0328*      | 0.0001*                   | 0.0001*    | -          | 0.0001*                                                | -            | -          | 0.0001*                   | 0.0001*                                | 0.5235 NS  | 0.0016*               | 0.0001*      | 0.0001*    | 0.5235 NS | -          |           |
|                     |            | Left             | 0.3141 NS                                                 | -          |            | 0.3141 NS                 |           | 0.0130*    | -                                                       |           | 0.0130*      | 0.0001*                   | 0.0001*    | -          | 0.0001*                                                | -            | -          | 0.0001*                   | -                                      | -          | 0.0001*               | 0.0016*      | 0.0001*    | 0.0001*   | 0.0011*    | 0.9490 NS |
|                     |            | Right            | 0.1056 NS5                                                | 0.0287*    |            | 0.0287*                   |           | 0.0027*    | 0.0036*                                                 |           | 0.0006*      | 0.0001*                   | 0.0001*    | -          | 0.0026*                                                | -            | -          | 0.0001*                   | -                                      | -          | 0.0001*               | -            | -          | -         | -          | 0.0001*   |
|                     | 70 km/h    | Center           | -                                                         | 0.3750 NS5 | 0.0106*    | 0.2950 NS5                | 0.0023*   | 0.1125 NS  | 0.2272 NS                                               | 0.0038*   | 0.0008*      | 0.0002*                   | -          | 0.4532 NS5 | 0.1400 NS                                              | 0.4532 NS5   | 0.0008*    | 0.2088 NS5                | 0.5196 NS                              | 0.0301*    | 0.0015*               | 0.0009*      | 0.7533 NS  | 0.7149 NS |            |           |
|                     |            | Left             | 0.5215 NS5                                                | 0.2314 NS5 |            | 0.1125 NS                 |           | 0.0038*    |                                                         | 0.0028*   | -            | 0.0554 NS5                | 0.0418*    | 0.2088 NS5 | 0.0301*                                                | 0.0015*      | 0.0009*    | 0.7533 NS                 | 0.7149 NS                              |            |                       |              |            |           |            |           |
|                     |            | Right            | 0.0009*                                                   | -          |            | 0.0009*                   |           | 0.8105 NS  |                                                         | 0.0152*   | 0.0001*      | 0.0003*                   | -          | 0.0003*    | -                                                      | 0.0003*      | -          | -                         | 0.7533 NS                              | 0.7149 NS  |                       |              |            |           |            |           |
|                     | 80 km/h    | Center           | -                                                         | 0.0157*    | 0.0048*    | 0.0157*                   | 0.0047*   | -          | 0.0001*                                                 | 0.0001*   | 0.0001*      | -                         | -          | -          | -                                                      | -            | -          | -                         | -                                      | 0.0001*    | -                     | 0.0001*      | -          | -         |            |           |
|                     |            | Left             | -                                                         | 0.1129 NS  |            | 0.1129 NS                 |           | -          | 0.0001*                                                 | 0.0001*   | 0.0001*      | -                         | -          | 0.1410 NS5 | -                                                      | 0.1410 NS5   | -          | 0.3909 NS5                | 0.0002*                                | 0.0001*    | 0.0002*               | 0.0002*      | 0.0232*    |           |            |           |
|                     |            | Right            | -                                                         | 0.6554 NS  |            | 0.6223 NS                 |           | -          | 0.8351 NS                                               | 0.6960 NS | 0.0001*      | 0.0001*                   | -          | -          | -                                                      | -            | -          | -                         | 0.3909 NS5                             | 0.0002*    | 0.0001*               | 0.0002*      | 0.0002*    | 0.0232*   |            |           |
|                     | 90 km/h    | Center           | -                                                         | 0.7506 NS5 | 0.0586 NS  | 0.7506 NS5                | 0.0586 NS | -          | 0.1172 NS5                                              | 0.1566 NS | 0.1770 NS    | -                         | -          | 0.2211 NS5 | 0.8121 NS5                                             | 0.2211 NS5   | 0.8121 NS5 | -                         | -                                      | 0.4285 NS  | 0.0337*               | 0.0008*      | 0.3745 NS  | 0.0011*   |            |           |
|                     |            | Left             | -                                                         | 0.1250 NS5 |            | 0.1250 NS5                |           | -          | 0.0435*                                                 | 0.0435*   | -            | -                         | -          | -          | 0.2211 NS5                                             | 0.8121 NS5   | 0.2211 NS5 | 0.8121 NS5                | -                                      | -          | 0.0008*               | 0.0337*      | 0.0008*    | -         | -          |           |
|                     |            | Right            | -                                                         | -          |            | -                         |           | -          | -                                                       | -         | -            | -                         | -          | -          | -                                                      | -            | -          | -                         | -                                      | -          | -                     | -            | -          | -         | -          | -         |
|                     | All speeds | Center           | 0.0002*                                                   | 0.0128 NS  | 0.0300*    | 0.0001*                   | 0.0001*   | 0.0131*    | 0.0009*                                                 | 0.0001*   | 0.0002*      | 0.0001*                   | 0.0001*    | 0.1805 NS5 | 0.2483 NS                                              | 0.0008*      | 0.0001*    | 0.4049 NS                 | 0.0764 NS                              | 0.0004*    | 0.0001*               | 0.0003*      | 0.0003*    | 0.1759 NS |            |           |
|                     |            | Left             | 0.7084 NS                                                 | 0.0025*    |            | 0.0390*                   |           | 0.2891 NS  | 0.0001*                                                 | 0.0001*   | 0.0002*      | 0.0010*                   | 0.0001*    | 0.0001*    | 0.6875 NS                                              | 0.2483 NS    | 0.0008*    | 0.0001*                   | 0.0750 NS                              | 0.0764 NS  | 0.0001*               | 0.0001*      | 0.0001*    | 0.0001*   | 0.1759 NS  |           |
|                     |            | Right            | 0.4527 NS                                                 | 0.3294 NS  |            | 0.8174 NS                 |           | 0.5587 NS  | 0.1668 NS                                               | 0.1259 NS | 0.0003*      | 0.0003*                   | 0.0003*    | 0.0003*    | -                                                      | 0.2483 NS    | 0.2483 NS  | 0.0003*                   | 0.0001*                                | 0.8388 NS  | 0.0764 NS             | 0.0001*      | 0.0001*    | 0.0001*   | 0.0001*    | 0.1759 NS |
| Axle group (G1)     | 60 km/h    | Center           | 0.4226 NS                                                 | -          | 0.0061*    | 0.4226 NS                 | 0.0003*   | 0.0003*    | -                                                       | 0.0001*   | 0.0003*      | 0.0001*                   | 0.0001*    | -          | -                                                      | 0.0001*      | 0.0001*    | 0.0001*                   | 0.0001*                                | 0.0001*    | 0.0001*               | 0.0001*      | 0.0001*    | 0.0001*   |            |           |
|                     |            | Left             | 0.0285*                                                   | -          |            | 0.0285*                   |           | 0.0001*    | -                                                       |           | 0.0001*      | 0.0001*                   | 0.0001*    | 0.0001*    | -                                                      | -            | 0.0001*    | 0.0001*                   | 0.0001*                                | 0.0001*    | 0.0001*               | 0.0001*      | 0.0001*    | 0.0001*   | 0.0001*    |           |
|                     |            | Right            | 0.0018*                                                   | 0.0151*    |            | 0.0010*                   |           | 0.0797 NS5 | 0.0009*                                                 |           | 0.0001*      | 0.0001*                   | 0.0001*    | 0.0001*    | -                                                      | -            | 0.0001*    | 0.0001*                   | 0.0001*                                | 0.0001*    | 0.0001*               | 0.0001*      | 0.0001*    | 0.0001*   | 0.0001*    |           |
|                     | 70 km/h    | Center           | -                                                         | 0.0148*    | 0.0083*    | 0.0148*                   | 0.0002*   | 0.0148*    | 0.3878 NS                                               | 0.2354 NS | 0.0148*      | 0.3878 NS                 | 0.3878 NS  | -          | 0.0001*                                                | 0.0001*      | 0.0001*    | 0.0005*                   | 0.4835 NS5                             | 0.0001*    | 0.0036*               | 0.0036*      | 0.0470 NS  | 0.0001*   |            |           |
|                     |            | Left             | 0.8335 NS5                                                | 0.2705 NS5 |            | 0.2413 NS                 |           | 0.6780 NS5 | 0.2494 NS5                                              |           | 0.7019 NS    | 0.1687 NS                 | 0.3698 NS  | 0.0006*    | 0.0030*                                                | 0.0001*      | 0.0001*    | 0.0019*                   | 0.0005*                                | 0.4835 NS5 | 0.0001*               | 0.0036*      | 0.0036*    | 0.0470 NS | 0.0001*    |           |
|                     |            | Right            | 0.0004*                                                   | -          |            | 0.0004*                   |           | 0.1046 NS  | 0.0004*                                                 |           | 0.1046 NS    | 0.3698 NS                 | 0.3698 NS  | 0.0006*    | 0.0030*                                                | 0.0001*      | 0.0001*    | 0.0019*                   | 0.0005*                                | 0.4835 NS5 | 0.0001*               | 0.0036*      | 0.0036*    | 0.0470 NS | 0.0001*    |           |
|                     | 80 km/h    | Center           | -                                                         | 0.2188 NS  | 0.0010*    | 0.0594 NS                 | 0.0007*   | -          | 0.7409 NS                                               | 0.8629 NS | 0.0594 NS    | 0.7409 NS                 | 0.7409 NS  | -          | -                                                      | -            | -          | -                         | -                                      | 0.0357*    | 0.0049*               | 0.0006*      | 0.9266 NS  | 0.0001*   |            |           |
|                     |            | Left             | -                                                         | 0.2985 NS  |            | 0.2985 NS                 |           | -          | 0.0544 NS                                               |           | 0.0544 NS    | 0.8629 NS                 | 0.8629 NS  | -          | -                                                      | 0.0774 NS5   | -          | 0.0774 NS5                | -                                      | 0.4987 NS5 | 0.0008*               | 0.0007*      | 0.0007*    | 0.9266 NS | 0.0001*    |           |
|                     |            | Right            | -                                                         | 0.0008*    |            | 0.0006*                   |           | -          | 0.1250 NS                                               |           | 0.1000 NS    | 0.8629 NS                 | 0.8629 NS  | -          | -                                                      | 0.0774 NS5   | -          | 0.0774 NS5                | -                                      | 0.4987 NS5 | 0.0008*               | 0.0007*      | 0.0007*    | 0.9266 NS | 0.0001*    |           |
|                     | 90 km/h    | Center           | -                                                         | 0.0992 NS5 | 0.0402*    | 0.0992 NS5                | 0.0402*   | -          | 0.0292*                                                 | 0.2521 NS | 0.0292*      | 0.2181 NS                 | 0.2181 NS  | -          | -                                                      | 0.0288*      | 0.0073*    | 0.0288*                   | 0.0073*                                | -          | -                     | 0.0007*      | 0.0007*    | 0.8357 NS |            |           |
|                     |            | Left             | -                                                         | 0.3092 NS5 |            | 0.3092 NS5                |           | -          | 0.5932 NS                                               |           | 0.5932 NS    | 0.2181 NS                 | 0.2181 NS  | -          | -                                                      | 0.0288*      | 0.0073*    | 0.0288*                   | 0.0073*                                | -          | -                     | 0.0007*      | 0.0007*    | 0.8357 NS |            |           |
|                     |            | Right            | -                                                         | -          |            | -                         |           | -          | -                                                       |           | -            | -                         | -          | -          | -                                                      | -            | -          | -                         | -                                      | -          | -                     | -            | -          | -         | -          | -         |
|                     | All speeds | Center           | 0.4226 NS                                                 | 0.0018*    | 0.0001*    | 0.0005*                   | 0.0001*   | 0.0078*    | 0.0345*                                                 | 0.0003*   | 0.0001*      | 0.0001*                   | 0.0001*    | 0.0001*    | 0.0001*                                                | 0.0001*      | 0.0001*    | 0.0001*                   | 0.0001*                                | 0.0001*    | 0.0001*               | 0.0001*      | 0.0001*    | 0.0001*   |            |           |
|                     |            | Left             | 0.0325*                                                   | 0.0509 NS  |            | 0.0034*                   |           | 0.0064*    | 0.0382*                                                 | 0.0080 NS | 0.6198 NS    | 0.0001*                   | 0.0001*    | 0.0001*    | 0.0001*                                                | 0.0001*      | 0.0001*    | 0.0001*                   | 0.0001*                                | 0.0001*    | 0.0001*               | 0.0001*      | 0.0001*    | 0.0001*   | 0.0001*    |           |
|                     |            | Right            | 0.0001*                                                   | 0.0001*    |            | 0.0001*                   |           | 0.0295*    | 0.0015*                                                 | 0.0295*   | 0.0001*      | 0.0001*                   | 0.0625 NS5 | 0.0625 NS5 | 0.0001*                                                | 0.0001*      | 0.0001*    | 0.0001*                   | 0.0001*                                | 0.0001*    | 0.0001*               | 0.0001*      | 0.0001*    | 0.0001*   | 0.0001*    |           |
| Axle group (G2)     | 60 km/h    | Center           | 0.0001*                                                   | -          | 0.1363 NS5 | 0.0001*                   | 0.0335*   | 0.0001*    | -                                                       | 0.0001*   | 0.0001*      | 0.0001*                   | 0.0003*    | -          | -                                                      | 0.0003*      | 0.0003*    | 0.2863 NS                 | 0.0037*                                | 0.0001*    | 0.0001*               | 0.0001*      | 0.2863 NS  | 0.1838 NS |            |           |
|                     |            | Left             | 0.8692 NS                                                 | -          |            | 0.8692 NS                 |           | 0.0001*    | -                                                       |           | 0.0001*      | 0.0001*                   | 0.0001*    | 0.0118*    | -                                                      | -            | 0.0118*    | -                         | -                                      | 0.0003*    | 0.0003*               | 0.2863 NS    | 0.0037*    | 0.0001*   | 0.0001*    | 0.2863 NS |
|                     |            | Right            | 0.1932 NS5                                                | 0.1363 NS5 |            | 0.0266*                   |           | 0.0244*    | 0.0001*                                                 |           | 0.0244*      | 0.0001*                   | 0.0001*    | 0.0118*    | -                                                      | -            | 0.0118*    | -                         | -                                      | 0.0003*    | 0.0003*               | 0.2863 NS    | 0.0037*    | 0.0001*   | 0.0001*    | 0.2863 NS |
|                     | 70 km/h    | Center           | -                                                         | 0.0831 NS5 | 0.0003*    | 0.0831 NS5                | 0.0047*   | -          | 0.0478 NS                                               | 0.0012*   | 0.0478 NS    | 0.0478 NS                 | -          | 0.145*     | 0.0922 NS5                                             | 0.1532 NS    | 0.7749 NS5 | 0.5863 NS                 | -                                      | 0.1056 NS  | 0.5567 NS             | 0.6126 NS    | 0.5567 NS  | 0.0023*   |            |           |
|                     |            | Left             | 0.3627 NS5                                                | 0.0456 NS5 |            | 0.0125*                   |           | 0.8444 NS5 | 0.0864 NS5                                              |           | 0.0875 NS    | 0.0875 NS                 | 0.0001*    | 0.0125*    | 0.0145*                                                | 0.0922 NS5   | 0.1532 NS  | 0.7749 NS5                | 0.5863 NS                              | -          | 0.1056 NS             | 0.5567 NS    | 0.6126 NS  | 0.5567 NS | 0.0023*    |           |
|                     |            | Right            | 0.0004*                                                   | -          |            | 0.0313*                   |           | 0.0001*    | -                                                       |           | 0.0001*      | 0.0001*                   | 0.0001*    | 0.0125*    | 0.0145*                                                | 0.0922 NS5   | 0.1532 NS  | 0.7749 NS5                | 0.5863 NS                              | -          | 0.1056 NS             | 0.5567 NS    | 0.6126 NS  | 0.5567 NS | 0.0023*    |           |
|                     | 80 km/h    | Center           | -                                                         | 0.0003*    | 0.0001*    | 0.0003*                   | 0.0001*   | -          | 0.0203*                                                 | 0.9084 NS | 0.0203*      | 0.7845 NS                 | 0.7845 NS  | -          | -                                                      | -            | -          | -                         | -                                      | 0.0162*    | 0.0701*               | 0.0016*      | 0.5979 NS  | 0.0001*   |            |           |
|                     |            | Left             | -                                                         | 0.0186*    |            | 0.0186*                   |           | -          | 0.6201 NS                                               |           | 0.6201 NS    | 0.0203*                   | 0.7845 NS  | 0.7845 NS  | -                                                      | -            | -          | -                         | -                                      | -          | 0.0162*               | 0.0701*      | 0.0016*    | 0.5979 NS | 0.0001*    |           |
|                     |            | Right            | -                                                         | 0.0892 NS  |            | 0.0644 NS                 |           | -          | 0.1167 NS                                               |           | 0.1167 NS    | 0.0688 NS                 | 0.7845 NS  | 0.7845 NS  | -                                                      | -            | -          | -                         | -                                      | -          | 0.0162*               | 0.0701*      | 0.0016*    | 0.5979 NS | 0.0001*    |           |
|                     | 90 km/h    | Center           | -                                                         | 0.3227 NS5 | 0.0084*    | 0.3227 NS5                | 0.0084*   | -          | 0.0080*                                                 | 0.1264 NS | 0.0080*      | 0.0879 NS                 | 0.0879 NS  | -          | -                                                      | -            | -          | -                         | -                                      | 0.1920 NS  | 0.0675 NS             | 0.0003*      | 0.1509 NS  | -         |            |           |
|                     |            | Left             | -                                                         | 0.0130*    |            | 0.0130*                   |           | -          | 0.5615 NS                                               |           | 0.5615 NS    | 0.0879 NS                 | 0.0879 NS  | -          | -                                                      | -            | -          | -                         | -                                      | 0.1920 NS  | 0.0675 NS             | 0.0003*      | 0.1509 NS  | -         |            |           |
|                     |            | Right            | -                                                         | -          |            | -                         |           | -          | -                                                       |           | -            | -                         | -          | -          | -                                                      | -            | -          | -                         | -                                      | -          | -                     | -            | -          | -         | -          | -         |
|                     | All speeds | Center           | 0.0001*                                                   | 0.0001*    | 0.0002*    | 0.0001*                   | 0.0001*   | 0.0001*    | 0.3667 NS                                               | 0.0001*   | 0.3667 NS    | 0.0127*                   | 0.0003*    | 0.0003*    | 0.2184 NS5                                             | 0.0024*      | 0.0008*    | 0.0029*                   | 0.2100 NS                              | 0.0774 NS  | 0.0009*               | 0.0001*      | 0.8452 NS  | 0.9219 NS |            |           |
|                     |            | Left             | 0.5525 NS                                                 | 0.0001*    |            | 0.0003*                   |           | 0.0023*    | 0.4791 NS                                               |           | 0.0023*      | 0.0236*                   | 0.0236*    | 0.0197*    | 0.0197*                                                | 0.0645 NS    | 0.0031*    | 0.0004*                   | 0.0001*                                | 0.0029*    | 0.2100 NS             | 0.0774 NS    | 0.0009*    | 0.0001*   | 0.8452 NS  | 0.9219 NS |
|                     |            | Right            | 0.0425*                                                   | 0.2949 NS  |            | 0.0246*                   |           | 0.0001*    | 0.0012*                                                 |           | 0.0001*      | 0.0001*                   | 0.0001*    | 0.0125*    | 0.0125*                                                | 0.0645 NS    | 0.0031*    | 0.0004*                   | 0.0001*                                | 0.0029*    | 0.2100 NS             | 0.0774 NS    | 0.0009*    | 0.0001*   | 0.8452 NS  | 0.9219 NS |
| Axle group (G3)     | 60 km/h    | Center           | -                                                         | -          | -          | -                         | -         | 0.0009*    | -                                                       | 0.0019*   | -            | 0.0009*                   | 0.0001*    | -          | -                                                      | 0.0001*      | 0.0001*    | 0.5827 NS5                | 0.0001*                                | 0.0001*    | 0.0001*               | 0.0001*      | 0.5827 NS5 | 0.0010*   |            |           |
|                     |            | Left             | -                                                         | -          |            | -                         |           | -          | -                                                       |           | -            | -                         | -          | -          | -                                                      | -            | -          | -                         | 0.0001*                                | 0.0001*    | 0.5827 NS5            | 0.0001*      | 0.0001*    | 0.0001*   | 0.5827 NS5 | 0.0010*   |
|                     |            | Right            | -                                                         | -          |            | -                         |           | -          | -                                                       |           | -            | -                         | -          | -          | -                                                      | -            | -          | -                         | 0.0001*                                | 0.0001*    | 0.5827 NS5            | 0.0001*      | 0.0001*    | 0.0001*   | 0.5827 NS5 | 0.0010*   |
|                     | 70 km/h    | Center           | -                                                         | -          | -          | -                         | -         | -          | 0.0051                                                  | 0.0044*   | 0.0051       | 0.0007*                   | 0.0001*    | -          | 0.2470 NS                                              | 0.0039*      | 0.0001*    | 0.0001*                   | 0.7371 NS5                             | 0.0024*    | 0.0017*               | 0.0017*      | 0.0543 NS  | 0.0001*   |            |           |
|                     |            | Left             | -                                                         | -          |            | -                         |           | -          | -                                                       |           | -            | -                         | -          | -          | -                                                      | -            | -          | 0.0039*                   | 0.0001*                                | 0.0001*    | 0.7371 NS5            | 0.0024*      | 0.0017*    | 0.0017*   | 0.0543 NS  | 0.0001*   |
|                     |            | Right            | -                                                         | -          |            | -                         |           | -          | -                                                       |           | -            | -                         | -          | -          | -                                                      | -            | -          | 0.0039*                   | 0.0001*                                | 0.0001*    | 0.7371 NS5            | 0.0024*      | 0.0017*    | 0.0017*   | 0.0543 NS  | 0.0001*   |
|                     | 80 km/h    | Center           | -                                                         | -          | -          | -                         | -         | -          | 0.0001*                                                 | 0.0001*   | 0.0001*      | 0.0001*                   | 0.0001*    | -          | -                                                      | -            | -          | -                         | -                                      | 0.0013*    | 0.0001*               | 0.0001*      | 0.0013*    | 0.0001*   |            |           |
|                     |            | Left             | -                                                         | -          |            | -                         |           | -          | -                                                       |           | -            | -                         | -          | -          | -                                                      | -            | -          | -                         | 0.0013*                                | 0.0001*    | 0.0001*               | 0.0013*      | 0.0001*    | 0.0001*   | 0.0013*    | 0.0001*   |
|                     |            | Right            | -                                                         | -          |            | -                         |           | -          | -                                                       |           | -            | -                         | -          | -          | -                                                      | -            | -          | -                         | 0.0013*                                | 0.0001*    | 0.0001*               | 0.0013*      | 0.0001*    | 0.0001*   | 0.0013*    | 0.0001*   |
|                     | 90 km/h    | Center           | -                                                         | -          | -          | -                         | -         | -          | 0.0553 NS5                                              | 0.0010*   | 0.0553 NS5   | 0.0566 NS                 | 0.0005*    | -          | -                                                      | 0.9767 NS5   | 0.6645 NS5 | 0.9767 NS5                | 0.6645 NS5                             | -          | -                     | 0.0192*      | 0.0018*    | 0.0219*   | 0.0028*    |           |
|                     |            | Left             | -                                                         | -          |            | -                         |           | -          | -                                                       |           | -            | -                         | -          | -          | -                                                      | -            | -          | 0.9767 NS5                | 0.6645 NS5                             | 0.9767 NS5 | 0.6645 NS5            | -            | -          | 0.0192*   |            |           |
